# Supplementary material
Source: Springer Nature journal article supplement (https://www.springermedizin.de/resource/supplementary/12936_2009_971_MOESM5_ESM.pdf/9548668)

Zindarou GW level compared to estimate GW level from  
composite field observations

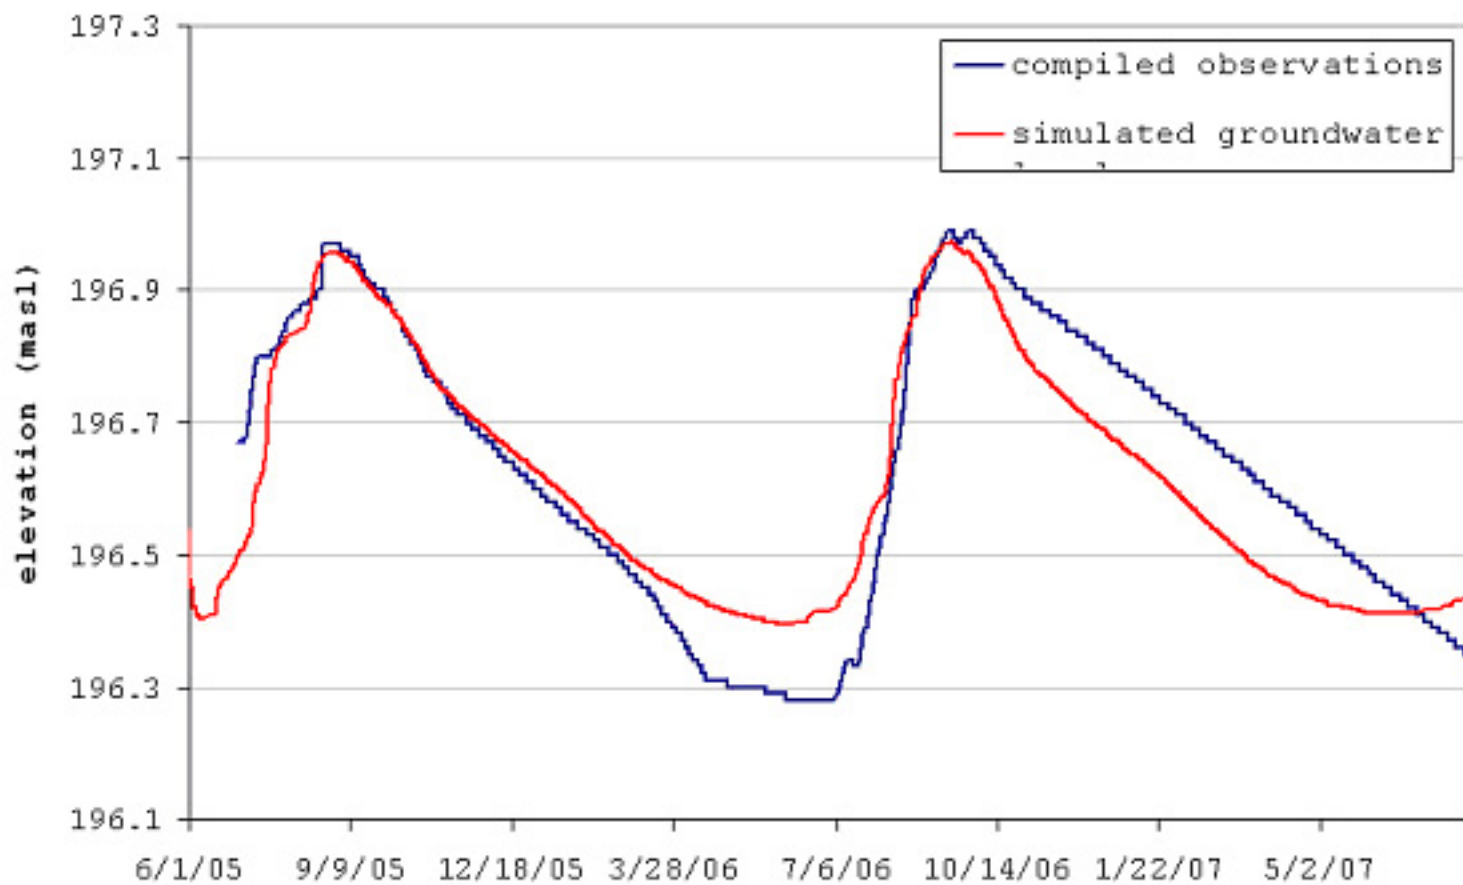

Supplement: MOESM5 [file 9548668]
